# Supplementary material for: The feasibility of granzyme B levels using an amperometric immunosensor for lung cancer detection
Source: PubMed Central journal article supplement — Ann Transl Med. 2022 Jun;10(11):622. doi: 10.21037/atm-22-470 (PMC9263765; doi:10.21037/atm-22-470), 2022-06
Supplement: atm-10-11-622-supplementary.pdf [file atm-10-11-622-supplementary.pdf]

Supplementary

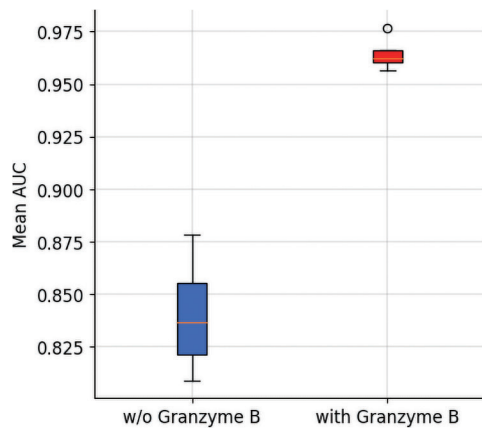

**Figure S1** Comparison of the mean AUC of the four machine learning models with and without granzyme B. AUC, area under the curve.

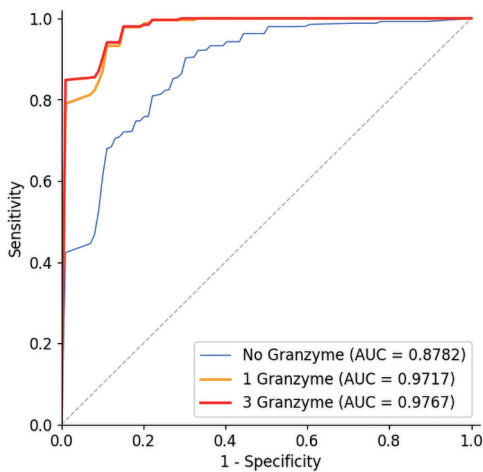

**Figure S2** Comparison of ROC curve in Random Forest by the number of granzyme B. ROC, receiver operating characteristics.

**Table S1** Performance evaluation of CEA and proGRP for lung cancer detection

|                              | CEA  | ProGRP |
|------------------------------|------|--------|
| Sensitivity, %               | 0.30 | 0.75   |
| Specificity, %               | 0.79 | 0.15   |
| Positive predictive value, % | 0.60 | 0.32   |
| Negative predictive value, % | 0.52 | 0.75   |

CEA, carcinoembryonic antigen; pro-GRP, pro-gastrin-releasing peptide.

**Table S2** Correlation of CRP, ANC, ALC, and NLR with granzyme B

|               | r      | P value |
|---------------|--------|---------|
| CRP           | -0.584 | 0.563   |
| Procalcitonin | 0.321  | 0.181   |
| ANC           | 0.193  | 0.240   |
| ALC           | -0.041 | 0.805   |
| NLR           | 0.117  | 0.479   |

CRP, C-reactive protein; ANC, absolute neutrophil count; ALC, absolute lymphocyte count; NLR, neutrophil-to-lymphocyte ratio.

**Table S3** The importance of additional features with granzyme B by comparing AUC

| Feature          | AUC   |
|------------------|-------|
| Granzyme B alone | 0.949 |
| Pack-years       | 0.975 |
| Smoking          | 0.974 |
| Sex              | 0.952 |
| Age              | 0.949 |
| CRP              | 0.959 |
| Procalcitonin    | 0.949 |
| NLR              | 0.956 |
| ANC              | 0.935 |
| ALC              | 0.948 |
| CEA              | 0.954 |

CRP, C-reactive protein; NLR, neutrophil-to-lymphocyte ratio; ANC, absolute neutrophil count; ALC, absolute lymphocyte count; CEA, carcinoembryonic antigen; AUC, area under the curve.

**Table S4** Baseline characteristics of propensity score matching (PSM) data

|                             | Healthy controls | Lung cancer | P value |
|-----------------------------|------------------|-------------|---------|
| No. of patients             | 21               | 21          |         |
| Mean age, y                 | 63.9             | 65.3        | 0.564   |
| Sex (male)                  | 20 (95.2%)       | 20 (95.2%)  | 1.000   |
| Currently smoking (current) | 7 (33.3%)        | 8 (38.1%)   | 1.000   |
| Mean pack-years             | 27.2             | 38.0        | 0.063   |
| Stage                       |                  |             |         |
| 1                           |                  | 3 (11.9%)   |         |
| 2                           |                  | 4 (7.1%)    |         |
| 3                           |                  | 3 (7.1%)    |         |
| 4                           |                  | 6 (14.3%)   |         |

**Table S5** Sensitivity, specificity, positive predictive value, negative predictive value after PSM

|                              | PSM data |
|------------------------------|----------|
| Sensitivity, %               | 1.00     |
| Specificity, %               | 0.91     |
| Positive predictive value, % | 0.95     |
| Negative predictive value, % | 1.00     |
| Cut-off                      | 19.8     |

**Table S6** Comparison of performance evaluation of Random Forest by the number of granzyme B

| Metric                       | 1 Granzyme B | 3 Granzyme B |
|------------------------------|--------------|--------------|
| Sensitivity, %               | 0.920        | 0.920        |
| Specificity, %               | 0.913        | 0.922        |
| Positive predictive value, % | 0.909        | 0.918        |
| Negative predictive value, % | 0.922        | 0.926        |
| Accuracy, %                  | 0.914        | 0.920        |
| ROC AUC                      | 0.972        | 0.977        |

ROC, receiver operating characteristics; AUC, area under the curve.
